# Supplementary material
Source: publisher site journal article supplement (https://www.spandidos-publications.com/2458/downloadSupplementary)

Figure S1. Hierarchial cluster analysis of gene expression in 0, 0.5, 3, 12 h in HOK (A) nad HSC2 (B) cells after the treatment with Elental. The expression counts in the cells at the indicated times were normalized by GAPDH expression counts, and converted to Z-score. The Z-score values were classified according to expression patterns by Hierarchial cluster analysis with a JMP Pro 14 software. HOK, human oral keratinocyte.

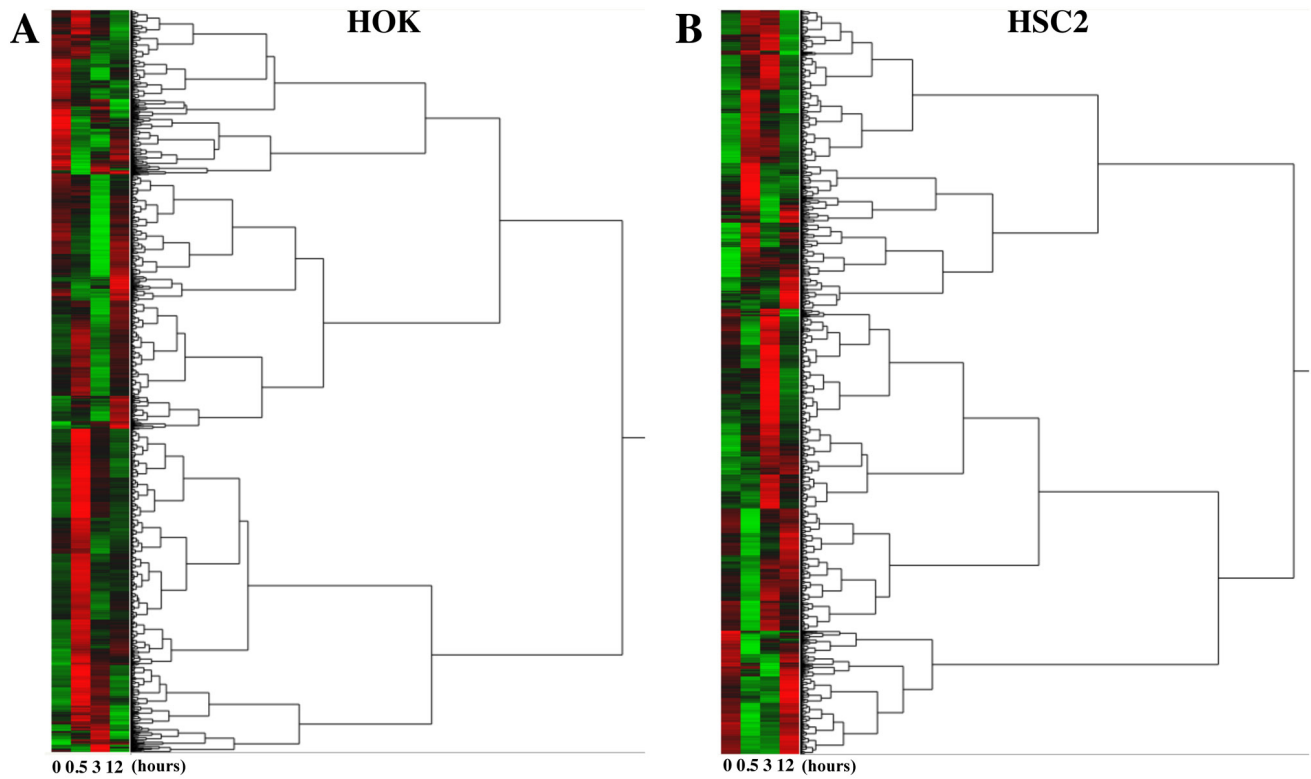

Supplement: Supplementary file 1 [file downloadSupplementary]
